# Supplementary material for: The Mechanisms of CHD8 in Neurodevelopment and Autism Spectrum Disorders
Source: MDPI journal article supplement (doi:10.3390/genes12081133), 2021-07-26
Supplement: s1 [file s1]

**Supplementary Table S1:** known CHD8 mutations.

|                                              | <u>AA change</u>  | <u>S.M</u>           | <u>Chr14 P</u>          | <u>NVIQ</u> | <u>VIQ</u> | <u>FSIQ</u> | <u>INT</u> | <u>Mut</u> | <u>Phen</u> |
|----------------------------------------------|-------------------|----------------------|-------------------------|-------------|------------|-------------|------------|------------|-------------|
| O’Roak et al. 2012 (1)                       | p.Gln959TERM      |                      |                         | 34          |            |             | DN         | n/a        | ASD         |
| Brian J. O’Roak et al. 2012 (2)              | p.Ser62X          | c.185C>G             | 21899618                | 78          |            |             | DN         | Ns         | ASD         |
|                                              | p.Tyr747X         |                      | 21878133                | 38          |            |             | DN         | Fs         | ASD+ID      |
|                                              |                   | c.3519-2A>G          |                         | 47          | 37         | 43          | DN         | Sp         | ASD         |
|                                              | p.Gln1238X        | c.3712C>T            | 21871178                | 34          | 75         | 74          | DN         | Ns         | ASD+ID      |
|                                              | p.Arg1337X        | c.4009C > T          | 21870169                | 92          |            |             | DN         | Ns         | ASD         |
|                                              | p.Glu2103ArgfsX3  | c.6307_6310del       | 21861643                | 67          |            |             | DN         | Fs         | ASD         |
|                                              | p.Leu2120ProfsX13 | c.6359_6360del       | 21861376                | 93          |            |             | DN         | Fs         | ASD         |
|                                              | p.Asn2371LysfsX2  | c.7112_7113insA      | 21859175                | 19          |            |             | DN         | Fs         | ASD+ID      |
|                                              | p.His2498del      |                      |                         | 98          |            |             | DN         | Aa         | ASD         |
| Bernier et al. 2014 (3)                      | p.Val984X         |                      |                         |             |            |             | IN         | Fs         | ASD/ID      |
|                                              | p.Glu1114X        | c.3340G>T            |                         | 41          | 27         | 34          | DN         | Ns         | ASD         |
|                                              | p.Glu1932SerfsX3  |                      |                         |             |            |             | DN         | Fs         | ASD/ID/DD   |
|                                              | p.Glu2136ArgfsX6  |                      |                         |             |            | <40         | DN         | Fs         | ID          |
|                                              | p.Lys2287 del     |                      |                         |             |            |             | n/a        | Aa         | ID/ADHD     |
|                                              | p.Arg910Gln       | c.2729G>A            |                         |             | 27         |             | DN         | Mns        | ASD+ID      |
|                                              | p.Gly1710Val      | c.5129G>T            |                         |             |            |             | IN         | Mns        | ASD+DD      |
|                                              | p.Arg1797Gln      | c.5390G>A            |                         |             |            |             | IN         | Mns        | ASD         |
| Prontera et al. 2014 (4)                     |                   | ~114Kb microdeletion | 21,823,852 – 21,937,621 |             | 76         |             | DN         | Md         | ASD         |
| B. J. O’Roak et al. 2014 (5) (Supplementary) | p.Arg212Gln       |                      |                         | 72          |            |             | DN         | Ms         | ASD         |
|                                              | p.Gln696Lys       |                      |                         | 125         | 88         |             | DN         | Ms         |             |
|                                              | p.Met904Ile       |                      |                         | 63          |            |             | DN         | Ms         | ASD+ID      |
|                                              | p.Arg1834X        | c.5500C>T            |                         | 93          |            |             | DN         | Ns         | ASD+ID      |
|                                              | p.Arg1580Trp      |                      |                         | 74          | 97         |             | DN         | Ms         | ASD         |
|                                              |                   | c.4818-2A>C          |                         | 103         | 96         |             | DN         | Ns         | ASD         |
|                                              |                   | c.5051 + 2T>A        |                         |             |            |             | DN         | Ns         | ASD         |

|                              |                   |                    |          |  |    |  |     |        |               |
|------------------------------|-------------------|--------------------|----------|--|----|--|-----|--------|---------------|
| Iossifov et al.<br>2014 (6)  |                   | c.1593_1601_38del  |          |  |    |  | DN  | Ssv    | ASD           |
| De Rubeis et al.<br>2014 (7) | p.Leu834Pro       |                    |          |  |    |  | DN  | Ms     | ASD           |
|                              | p.Arg1242Gln      |                    |          |  |    |  | DN  | Ms     | ASD           |
|                              | p.Gly1602ValfsX15 |                    |          |  |    |  | DN  | Ssv-Fs | ASD           |
|                              | p.Ser1606ArgfsX8  |                    |          |  |    |  | DN  | Ssv-Fs | ASD           |
|                              | p.Tyr1642LeufsX25 |                    |          |  |    |  | DN  | Ssv-Fs | ASD           |
| Talkowski et al.<br>2012 (8) |                   | t.14q11.2; 3q25.31 |          |  |    |  | DN  | Tr     | ASD+ID        |
| McCarthy et al.<br>2014 (9)  | p.Ser2173X        | c.6518C>A          | 21860919 |  |    |  | DN  | Ns     | ASD+SHZ       |
| Kimura et al.<br>2016 (10)   | p.His1439del      |                    |          |  | 50 |  | DN  |        | SCZ           |
|                              | p.Lys2287del      |                    |          |  |    |  | DN  |        | SCZ           |
|                              | p.Arg2333Cys      |                    |          |  | 50 |  | DN  |        | ASD+ID+DD+SCZ |
|                              | p.Arg773Gln       |                    |          |  |    |  | DN  |        | ASD+SCZ       |
| Merner et al.<br>2016 (11)   | p.Asn2092LysfsX2  | c.6276dup          | 21859176 |  | 56 |  | DN  | Fs     | ASD+ID        |
|                              | p.Arg7Cys         | c.19C>T            | 21897482 |  |    |  | IN  | Pms    | ASD           |
|                              | p.Ile1325Thr      | c.3974T>C          | 21868146 |  |    |  | IN  | nSn    | SCZ           |
|                              | p.Glu1750Lys      | 5248G>A            | 21861869 |  |    |  | n/a | nSn    | ASD           |
|                              | p.Arg1879Cys      | c.5635C>T          | 21860965 |  |    |  | IN  | nSn    | SCZ           |
|                              | p.Arg1901Cys      | c.5701C>T          | 21860899 |  |    |  | n/a | nSn    | SCZ           |
|                              | p.Gly1998Ala      | c.5993G>C          | 21860047 |  |    |  | n/a | nSn    | ID            |
|                              | p.Arg2035Gln      | c.6104G>A          | 21859746 |  |    |  | IN  | nSn    | SCZ           |
|                              | p.Gly162Gly       | G/C                | 21896306 |  |    |  | IN  | Sn     | ASD           |
|                              | p.Leu1305Leu      | A/G                | 21868205 |  |    |  | IN  | Sn     | SCZ           |
|                              | p.Ala1693Ala      | A/G                | 21862038 |  |    |  | IN  | Sn     | SCZ           |
|                              | p.Glu1825Glu      | G/A                | 21861642 |  |    |  | IN  | Sn     | ASD           |
|                              | p.His1989His      | C/T                | 21860073 |  |    |  | IN  | Sn     | ID            |
|                              | p.Asp2261Asp      | C/T                | 21853898 |  |    |  | IN  | Sn     | ASD           |

|                            |                   |                            |                                |    |  |  |    |     |           |
|----------------------------|-------------------|----------------------------|--------------------------------|----|--|--|----|-----|-----------|
| Smyk et al. 2016 (12)      |                   | ~445 kb microduplication   | 21,507,092-21,952,439          |    |  |  | DN | Md  | DD+HDAD   |
| Zahir et al. 2007 (13)     |                   | ~101 kb microduplication   | 20,896,740 – 20,998,178        |    |  |  | DN | Md  | DD+ID     |
|                            |                   | ~1.6 Mb microduplication   | 19,584,863 – 21,207,935        |    |  |  | DN | Md  | DD+ID     |
|                            |                   | ~1.079 Mb microduplication | 19,853,310 – 20,932,827        |    |  |  | DN | Md  | DD+ID     |
| Terrone et al. 2014 (14)   |                   | ~2.89 Mb microduplication  | chr14: 19,788,445 - 22,675,219 |    |  |  | DN | Md  | ASD       |
| T. Wang et al. 2016 (15)   | p.Asp691Gly       |                            |                                |    |  |  | DN | Ms  | ASD       |
|                            | p.Lys750AsnfsX14  |                            |                                |    |  |  | DN | LGD | ASD       |
|                            | p.Asn1235MetfsX18 |                            |                                |    |  |  | DN | LGD | ASD       |
|                            | p.Arg1897ThrfsX23 |                            | 21862265                       |    |  |  | DN | LGD | ASD       |
| Stolerman et al. 2016 (16) |                   | Exons 26-28 deletion       | 21,863,796-21,868,103          |    |  |  | DN |     | ASD+DD+ID |
| Han et al. 2018 (17)       | p.Arg1551Cys      | c.4651C>T                  |                                | 65 |  |  | DN | Ms  | ID        |
| J. Wang et al. 2018 (18)   | p.Glu883X         | c.2647C > A                |                                |    |  |  | DN | Ns  | ASD+DD    |
|                            | p.Met559Ile       | c.1677C > A                |                                |    |  |  | DN | Ms  | ASD+DD    |
| D’Gama et al. 2015 (19)    | p.Val744Ile       | c.2230G > A                |                                |    |  |  | DN | Ms  | ASD+ID    |
| Cappi et al. 2016 (20)     | p.Elu1327Lys      | C > T                      | 21870199                       |    |  |  | DN | Ms  | ID+OCD    |
| Arnett et al. 2018 (21)    | p.Glu1727X        | c.5179G > T                |                                |    |  |  | DN | Sg  | ASD       |
|                            | p.Arg1402X        | c.4204C > T                |                                |    |  |  | DN | Sg  | ASD       |
|                            | p.Ile1108AsnfsX7  | c.3322 3323insA            |                                |    |  |  | DN | Fs  | ASD       |
|                            | p.Asn807ThrfsX78  | c.2420del                  |                                |    |  |  | DN | Fs  | ASD       |
|                            | p.Arg952X         | c.2854C > T                |                                |    |  |  | DN | Sg  | ASD       |

|                               |                 |                     |                           |  |  |  |           |    |           |
|-------------------------------|-----------------|---------------------|---------------------------|--|--|--|-----------|----|-----------|
|                               | p.His782ProfsX7 | c.2345del           |                           |  |  |  | DN        | Fs | ASD       |
|                               |                 | c.3882 + 1G > A     |                           |  |  |  | DN        | Sp | ASD       |
| Wong et al.<br>2019 (22)      | p.Pro165Leu     | c.494C>T            |                           |  |  |  | DN        | Ms | ASD       |
| Yasin et al.<br>2019 (23)     |                 | ~33.269 kb deletion | 21,827,942-<br>21,861,211 |  |  |  | DN        |    | ASD+ID+DD |
| Ostrowski et al.<br>2019 (24) |                 | c.470del            |                           |  |  |  | DN        | Fs | ID        |
|                               |                 | c.517_533del        |                           |  |  |  | DN        | Fs | ID        |
|                               | p.Arg564X       | c.1690c>T           |                           |  |  |  | DN        | Sg | ASD+ID    |
|                               |                 | c.1899+1G>T         |                           |  |  |  | DN        | Ss | ASD+ID    |
|                               |                 | c.2024+5G>A         |                           |  |  |  | DN        | Sg | ID        |
|                               | p.Glu714X       | c.2140G>T           |                           |  |  |  | DN        | Sg | ASD+ID    |
|                               | p.Tyr854X       | c.2562_2563del p.   |                           |  |  |  | DN        | Sg | ASD+ID    |
|                               | p.Asn873Asp     | c.2617A>G           |                           |  |  |  | DN        | Sg | ASD+ID    |
|                               | p.Thr976Lys     | c.2927C>A           |                           |  |  |  | DN        | Fs | ID        |
|                               |                 | c.3011_3012del      |                           |  |  |  | DN        | Sp | ASD+ID    |
|                               |                 | c.3518+5G>C         |                           |  |  |  | DN        | Fs | ASD+ID    |
|                               |                 | c.3528_3529insAA    |                           |  |  |  | Inherited | Fs | ID        |
|                               |                 | c.3569_3587del      |                           |  |  |  | DN        | Sg | ID        |
|                               |                 | c.4093_4094del      |                           |  |  |  | DN        | Fs | ASD+ID    |
|                               | p.Arg1472X      | c.4414C>T           |                           |  |  |  | DN        | Sg | ASD+ID    |
|                               | p.Ser1420X      | c.4259_4260del      |                           |  |  |  | DN        | Fs | ID        |
|                               |                 | c.5386del           |                           |  |  |  | IN        | Sg | ID        |
|                               |                 | c.5599+2T>C         |                           |  |  |  | N/A       | Fs | ID        |
|                               |                 | c.6115del           |                           |  |  |  | n/a       | Fs | ID        |

|                               |                   |                  |                       |  |  |  |     |          |           |
|-------------------------------|-------------------|------------------|-----------------------|--|--|--|-----|----------|-----------|
|                               |                   | c.7511dup        |                       |  |  |  | DN  | Fs       | ID        |
| Cotney et al.<br>2015 (18,25) | p.Arg286Cys       | c.856C > T       |                       |  |  |  |     | Missense | ASD       |
|                               | p.Arg2158Cys      | c.6472C > T      |                       |  |  |  |     | Missense | ASD       |
|                               | p.Arg2180Cys      | c.6538C > T      |                       |  |  |  |     | Missense | ASD       |
|                               | p.G2277Ala        | c.6830G > C      |                       |  |  |  |     | Missense | ASD       |
|                               | p.Arg2314Gln      | c.6941G > A      |                       |  |  |  |     | Ns       | ASD       |
| Siu et al. 2019<br>(26)       | p.Arg1173Gly      | c.3517 A>G       |                       |  |  |  | DN  |          | ASD       |
|                               | p.Asn740Ser       | c.2219A>G        |                       |  |  |  | IN  |          | ASD       |
|                               | p.Pro2281Ala      | c.6841C>G        |                       |  |  |  | IN  |          | ASD       |
|                               | p.Gly2189Arg      | c.6565G>A        |                       |  |  |  | IN  |          | ASD       |
|                               | p.Ala1314Thr      | c.3940G>A;       |                       |  |  |  | IN  |          | ASD       |
|                               | p.His2500Pro      | c.7499A>C        |                       |  |  |  | n/a |          | ASD       |
|                               | p.Thr2050fs       | c.6148dupA       |                       |  |  |  | DN  |          | ASD       |
|                               |                   | c.4215G>T        |                       |  |  |  | ID  | Sn       | ASD       |
|                               | p.Arg2217         | c.6649C>T        |                       |  |  |  | ID  |          | ASD       |
|                               | p.Pro2316LeufsX39 | c.6947delC       |                       |  |  |  | n/a |          | ASD       |
|                               | p.Arg1443Cys      | c.4327C>T        |                       |  |  |  | ID  |          | ASD       |
| Douzgou et al.<br>2019 (27)   | p.Ser1420X        | c.4259_4261GTC>G | 21869143-<br>2186914  |  |  |  | n/a | Sg       | ASD+ID    |
|                               | p.Glu1004ValfsX22 | c.3011_3012GA>T  | 21873918-<br>21873920 |  |  |  | DN  | Fs       | DD        |
|                               |                   | c.1899+1G        | 21883883-<br>21883883 |  |  |  | DN  | Sp       | ASD+ID    |
|                               | p.Lys545AsnfsX47  | c.1635delCA>C    | 21894367-<br>21894368 |  |  |  | n/a | Fs       | ASD+ID    |
|                               | p.Arg1242X        | c.3724C>T_       | 21870653-<br>21870653 |  |  |  | DN  | Sg       | ASD+ID+DD |
|                               | p.Gln687X         | c.2059C>T        | 21882543-<br>2188254  |  |  |  | DN  | Sg       | ASD+ID    |

|                               |               |                         |                         |    |  |  |    |     |           |
|-------------------------------|---------------|-------------------------|-------------------------|----|--|--|----|-----|-----------|
|                               | p.Tyr902X     | c.2706GT>G              | 21876494-2187649        |    |  |  | DN | Sg  | ASD       |
|                               | p.Tyr854X     | c.2562_2563del          | 21876637-21876639       |    |  |  | DN | Sg  | ASD+ID    |
|                               |               | c.3518+1                | 21877595-21877595       |    |  |  | DN | Sp  | ID        |
|                               | p.Leu1206X    | c.3617T>G               | 21871273--21871273      |    |  |  | DN | Sg  | ASD+ID    |
| Smol et al. 2020 (28)         |               | 401 kb microduplication | 21499240 - 21899985 × 3 |    |  |  |    | Md  | ASD+DD+ID |
|                               |               | 277 kb duplication      | 21622823 - 21899759 × 3 |    |  |  |    |     | DD        |
| Tran et al. 2020 (29)         | p.Ile1192Thr  | c.3575 T > C            | 21871315                |    |  |  | DN | Ms  | ASD       |
| Wu et al. 2020 (30)           | p.G1602Vfs*13 | c.4800delA              | 21399998-21399998       | 79 |  |  | DN | Fs  | ASD       |
|                               | p.N885Tfs*14  | c.2654delA              | 21408388-21408388       |    |  |  | IN | Fs  | ASD       |
| Alotaibi and Ramzan 2020 (31) | p.Arg1662Ter  | c.4984C>T               |                         |    |  |  | DN | Pms | ASD+DD+ID |
| An et al. 2020 (32)           | p.Tyr1168Asn  | c.3502 T>A              |                         |    |  |  | DN | Ms  | ASD       |
|                               | p.Arg1188X    | c.3562C>T               |                         |    |  |  | DN | Ns  | ASD+ID    |
|                               |               | c.4818-1G>A             |                         |    |  |  | DN | Sp  | ASD       |

|  |              |           |  |  |  |  |    |    |        |
|--|--------------|-----------|--|--|--|--|----|----|--------|
|  |              |           |  |  |  |  |    |    |        |
|  | p.Glu689X    | c.2065C>A |  |  |  |  | DN | Ns | ASD+DD |
|  | p.Lys2286Arg | c.6857A>G |  |  |  |  |    | Ms | ASD    |
|  | p.Arg773Gln  | c.2318G>A |  |  |  |  | IN |    | ASD    |
|  | p.Val2521Ala | c.7562T>C |  |  |  |  | IN |    | ASD    |

**Abbreviations:** **AA change**- amino acid change, **S.M**-sequencing mutation, **Chr14 P**- chromosome 14 position, **NVIQ**- non-verbal I.Q, **VIQ**- verbal I.Q, **FSIQ**- Full Scale I.Q, **INT**- inherited type, **MutT**-mutation type, **Phen**- phenotype. **DN**- de novo, **IN**- inherited, **Fs**-frameshifting indel, **Ns**-nonsense, **Sp**-splice-site, **Aa**- single amino acid deletion, **Ms**-missense, **Mns**- Missense near splice site, **Tr**- Translocation, **Ssv**- Splice site variant, **nSn**- non-synonymous, **Sn**- synonymous, **Sg**- stop-gained, **Pms**- premature stop codon, **Md**- microdeletion, **Dup**- duplication, **LGD**- likely gene-disruptive, **ASD**- autism spectrum disorder, **ID**- intellectual disability, **DD**- developmental delay, **SCZ**- Schizophrenia.

Fs-frameshift, X-stop, X23-stop after 23 amino acid, Ter- stop, Arg 1023del- amino acid Arg in position 1023 was deleted.

## References:

1. O’Roak BJ, Vives L, Girirajan S, Karakoc E, Krumm N, Coe BP, et al. Sporadic autism exomes reveal a highly interconnected protein network of de novo mutations. *Nature*. 2012;485(7397):246–50.
2. O’Roak BJ, Vives L, Fu W, Egertson JD, Stanaway IB, Phelps IG, et al. Multiplex targeted sequencing identifies recurrently mutated genes in autism spectrum disorders. *Science* (80- ) [Internet]. 2012 Dec 21 [cited 2020 Oct 26];338(6114):1619–22. Available from: <https://www.sciencemag.org/lookup/doi/10.1126/science.1227764>
3. Bernier R, Golzio C, Xiong B, Stessman HA, Coe BP, Penn O, et al. Disruptive CHD8 mutations define a subtype of autism early in development. *Cell* [Internet]. 2014;158(2):263–76. Available from: <http://dx.doi.org/10.1016/j.cell.2014.06.017>

4. Prontera P, Ottaviani V, Toccaceli D, Rogaia D, Ardisia C, Romani R, et al. Recurrent ~100 Kb microdeletion in the chromosomal region 14q11.2, involving CHD8 gene, is associated with autism and macrocephaly. *Am J Med Genet Part A*. 2014;164(12):3137–41.
5. O’Roak BJ, Stessman HA, Boyle EA, Witherspoon KT, Martin B, Lee C, et al. Recurrent de novo mutations implicate novel genes underlying simplex autism risk. *Nat Commun* [Internet]. 2014;5. Available from: [www.nature.com/naturecommunications](http://www.nature.com/naturecommunications)
6. Iossifov I, O’Roak BJ, Sanders SJ, Ronemus M, Krumm N, Levy D, et al. The contribution of de novo coding mutations to autism spectrum disorder. *Nature* [Internet]. 2014;515(7526):216–21. Available from: <http://dx.doi.org/10.1038/nature13908>
7. De Rubeis S, He X, Goldberg AP, Poultney CS, Samocha K, Cicek AE, et al. Synaptic, transcriptional and chromatin genes disrupted in autism. *Nature* [Internet]. 2014;515(7526):209–15. Available from: <http://dx.doi.org/10.1038/nature13772>
8. Talkowski ME, Rosenfeld JA, Blumenthal I, Pillalamarri V, Chiang C, Heilbut A, et al. Sequencing chromosomal abnormalities reveals neurodevelopmental loci that confer risk across diagnostic boundaries. *Cell* [Internet]. 2012;149(3):525–37. Available from: <http://dx.doi.org/10.1016/j.cell.2012.03.028>
9. McCarthy SE, Gillis J, Kramer M, Lihm J, Yoon S, Bernstein Y, et al. De novo mutations in schizophrenia implicate chromatin remodeling and support a genetic overlap with autism and intellectual disability. *Mol Psychiatry* [Internet]. 2014;19(6):652–8. Available from: <http://www.1000genomes.org/>
10. Kimura H, Wang C, Ishizuka K, Xing J, Takasaki Y, Kushima I, et al. Identification of a rare variant in CHD8 that contributes to schizophrenia and autism spectrum disorder susceptibility. *Schizophr Res*. 2016;178(1–3):104–6.
11. Merner N, Forgeot d’Arc B, Bell SC, Maussion G, Peng H, Gauthier J, et al. A de novo frameshift mutation in chromodomain helicase DNA-binding domain 8 (CHD8): A case report and literature review. *Am J Med Genet Part A*. 2016;170(5):1225–35.
12. Smyk M, Poluha A, Jaszcuk I, Bartnik M, Bernaciak J, Nowakowska B. Novel 14q11.2 microduplication including the CHD8 and SUPT16H genes associated with developmental delay. *Am J Med Genet Part A*. 2016;170(5):1325–9.
13. Zahir F, Firth H V, Baross A, Delaney AD, Eydoux P, Gibson WT, et al. Novel deletions of 14q11.2 associated with developmental delay, cognitive impairment and similar minor anomalies in three children. *J Med Genet* [Internet]. 2007;44(9):556–61. Available from: [www.jmedgenet.com](http://www.jmedgenet.com)
14. Terrone G, Cappuccio G, Genesio R, Esposito A, Fiorentino V, Riccitelli M, et al. A case of 14q11.2 microdeletion with autistic features, severe obesity and facial dysmorphisms suggestive of Wolf-Hirschhorn syndrome. *Am J Med Genet Part A*. 2014;164(1):190–3.
15. Wang T, Guo H, Xiong B, Stessman HAF, Wu H, Coe BP, et al. De novo genic mutations among a Chinese autism spectrum disorder cohort. *Nat*



Commun [Internet]. 2016;7. Available from: [www.nature.com/naturecommunications](http://www.nature.com/naturecommunications)

16. Stoleran ES, Smith B, Chaubey A, Jones JR. CHD8 intragenic deletion associated with autism spectrum disorder. *Eur J Med Genet* [Internet]. 2016;59(4):189–94. Available from: <http://dx.doi.org/10.1016/j.ejmg.2016.02.010>
17. Han JY, Jang JH, Park J, Lee IG. Targeted next-generation sequencing of Korean patients with developmental delay and/or intellectual disability. *Front Pediatr* [Internet]. 2018;6:391. Available from: [https://www.](https://www.frontiersin.org/article/10.3389/fped.2018.00391)
18. Wang J, Liu J, Gao Y, Wang K, Jiang K. Autism Spectrum Disorder Early in Development Associated with CHD8 Mutations among Two Chinese Children. *BMC Pediatr*. 2018;18(1):1–7.
19. D’Gama AMD, Pochareddy S, Li M, Jamuar SS, Reiff RE, Lam AN, et al. Targeted DNA sequencing from autism spectrum disorder brains implicates multiple genetic mechanisms. *Neuron*. 2015;88(5):910–7.
20. Cappi C, Brentani H, Lima L, Sanders SJ, Zai G, Diniz BJ, et al. Whole-exome sequencing in obsessive-compulsive disorder identifies rare mutations in immunological and neurodevelopmental pathways. *Transl Psychiatry*. 2016;6(3).
21. Arnett AB, Rhoads CL, Hoekzema K, Turner TN, Gerds J, Wallace AS, et al. The autism spectrum phenotype in ADNP syndrome. *Autism Res*. 2018;11(9):1300–10.
22. Wong WR, Brugman KI, Maher S, Oh JY, Howe K, Kato M, et al. Autism-Associated missense genetic variants impact locomotion and neurodevelopment in *Caenorhabditis elegans*. *Hum Mol Genet*. 2019;28(13):2271–81.
23. Yasin H, Gibson WT, Langlois S, Stowe RM, Tsang ES, Lee L, et al. A distinct neurodevelopmental syndrome with intellectual disability, autism spectrum disorder, characteristic facies, and macrocephaly is caused by defects in CHD8. *J Hum Genet* [Internet]. 2019;64(4):271–80. Available from: <https://doi.org/10.1038/s10038-019-0561-0>
24. Ostrowski PJ, Zachariou A, Loveday C, Beleza-Meireles A, Bertoli M, Dean J, et al. The CHD8 overgrowth syndrome: A detailed evaluation of an emerging overgrowth phenotype in 27 patients. *Am J Med Genet Part C Semin Med Genet*. 2019;181(4):557–64.
25. Cotney J, Muhle RA, Sanders SJ, Liu L, Willsey AJ, Niu W, et al. The autism-associated chromatin modifier CHD8 regulates other autism risk genes during human neurodevelopment. *Nat Commun* [Internet]. 2015;6:1–11. Available from: <http://dx.doi.org/10.1038/ncomms7404>
26. Siu MT, Butcher DT, Turinsky AL, Cytrynbaum C, Stavropoulos DJ, Walker S, et al. Functional DNA methylation signatures for autism spectrum disorder genomic risk loci: 16p11.2 deletions and CHD8 variants. *Clin Epigenetics*. 2019;11(1):1–19.

27. Douzgou S, Liang HW, Metcalfe K, Somarathi S, Tischkowitz M, Mohamed W, et al. The clinical presentation caused by truncating CHD8 variants. *Clin Genet*. 2019;96(1):72–84.
28. Smol T, Thuillier C, Boudry-Labis E, Dieux-Coeslier A, Duban-Bedu B, Caumes R, et al. Neurodevelopmental phenotype associated with CHD8-SUPT16H duplication. *Neurogenetics*. 2020;21(1):67–72.
29. Tran KT, Le VS, Bui HTP, Do DH, Ly HTT, Nguyen HT, et al. Genetic landscape of autism spectrum disorder in Vietnamese children. *Sci Rep* [Internet]. 2020;10(1):1–11. Available from: <http://dx.doi.org/10.1038/s41598-020-61695-8>
30. Wu H, Li H, Bai T, Han L, Ou J, Xun G, et al. Phenotype-to-genotype approach reveals head-circumference-associated genes in an autism spectrum disorder cohort. *Clin Genet*. 2020;97(2):338–46.
31. Alotaibi M, Ramzan K. A de novo variant of CHD8 in a patient with autism spectrum disorder. *Discoveries* [Internet]. 2020;8(1):e107. Available from: [www.discoveriesjournals.org/discoveries](http://www.discoveriesjournals.org/discoveries)
32. An Y, Zhang L, Liu W, Jiang Y, Chen X, Lan X, et al. De novo variants in the Helicase-C domain of CHD8 are associated with severe phenotypes including autism, language disability and overgrowth. *Hum Genet*. 2020;139(4):499–512.
